# Supplementary material
Source: Springer Nature journal article supplement (https://www.springermedizin.de/resource/supplementary/12936_2009_918_MOESM4_ESM.pdf/9548536)

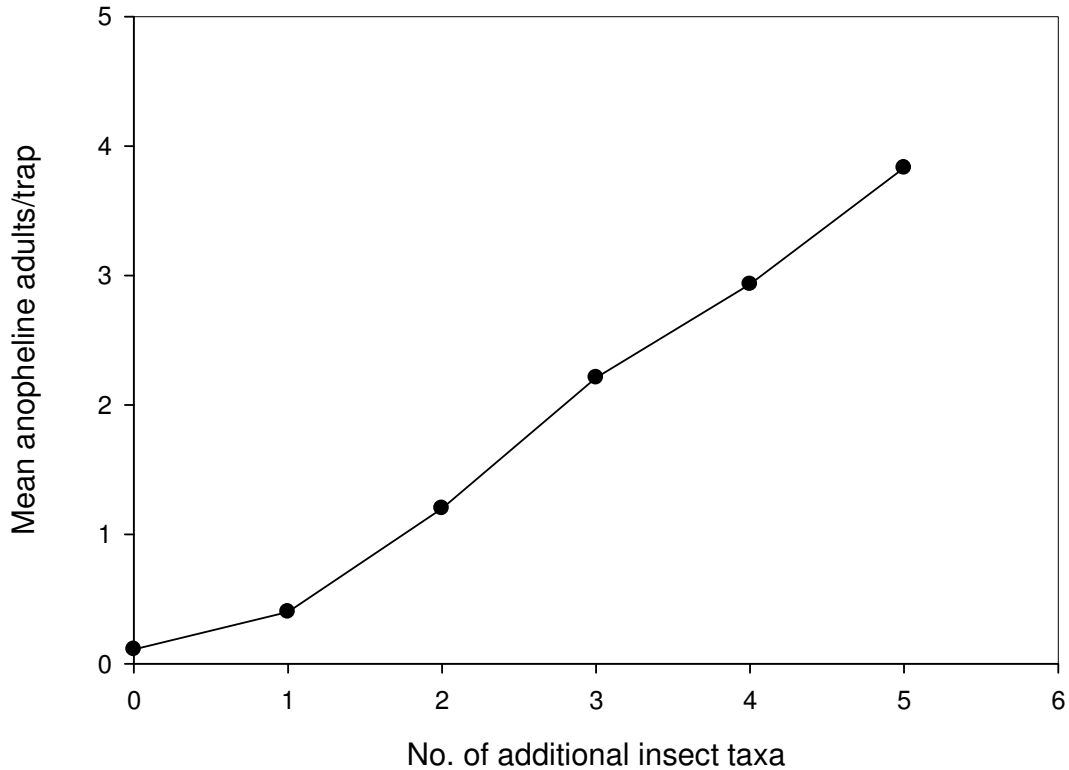

Supplement: MOESM4 [file 9548536]
